# Supplementary material for: An in vitro study to elucidate the effects of Product Nkabinde on immune response in peripheral blood mononuclear cells of healthy donors
Source: Front Pharmacol. 2024 Mar 12;15:1308913. doi: 10.3389/fphar.2024.1308913 (PMC10963514; doi:10.3389/fphar.2024.1308913)
Supplement: Supplementary file 3 [file Table1.xlsx]

## Sheet: Table 1 (T cells)
			PHA (Unstimulated)						PN (PHA)						PHA (PHA+PN)						PN (Unstimulated)							PN (PHA+PN)						PHA+PN (Unstimulated)
Time	Cytometry	PHA Mean (SD)	Unstimulated Mean (SD)	OR (95% CI)	Standard Error	DF	t Value	Adj P	PN Mean (SD)	OR (95% CI)	Standard Error	DF	t Value	Adj P	PHA Mean (SD)	OR (95% CI)	Standard Error	DF	t Value	Adj P	PN Mean (SD)	Unstimulated Mean (SD)	OR (95% CI)	Standard Error	DF	t Value	Adj P	PHA+PN Mean (SD)	OR (95% CI)	Standard Error	DF	t Value	Adj P	PHA+PN Mean (SD)	Unstimulated Mean (SD)	OR (95% CI)	Standard Error	DF	t Value	Adj P
24 Hours	CD3+	25.95 (11.85)	47.66 (19.51)	0.385 (0.139;1.067)	0.372	53	-2.566	0.079	47.38 (17.15)	2.568 (0.927;7.119)	0.372	53	2.536	0.085	37.31(16.24)	0.589 (0.209;1.656)	0.377	53	-1.403	0.998	47.38 (17.15)	47.66 (19.51)	0.989 (0.382;2.56)	0.347	53	-0.032	1	37.31(16.24)	1.513 (0.575;3.978)	0.353	53	1.173	1	37.31(16.24)	47.66 (19.51)	0.654 (0.249;1.719)	0.353	53	-1.205	1
	CD4+	54.08 (13.20)	56.05 (12.06)	0.923 (0.486;1.752)	0.234	53	-0.341	1	51.50 (11.84)	0.902 (0.476;1.708)	0.233	53	-0.444	1	47.54 (12.69)	1.299 (0.686;2.462)	0.233	53	1.124	1	51.50 (11.84)	56.05 (12.06)	0.833 (0.439;1.579)	0.233	53	-0.785	1	47.54 (12.69)	1.172 (0.619;2.218)	0.233	53	0.681	1	47.54 (12.69)	56.05 (12.06)	0.711 (0.375;1.348)	0.234	53	-1.463	0.896
	CD8+	43.55 (13.72)	38.79 (12.22)	1.217 (0.631;2.35)	0.24	53	0.82	1	39.21 (12.77)	0.836 (0.434;1.613)	0.24	53	-0.747	1	39.50 (12.04)	1.182 (0.613;2.278)	0.24	53	0.697	1	39.21 (12.77)	38.79 (12.22)	1.018 (0.525;1.975)	0.242	53	0.074	1	39.50 (12.04)	0.988 (0.51;1.915)	0.241	53	-0.05	1	39.50 (12.04)	38.79 (12.22)	1.03 (0.531;1.998)	0.242	53	0.124	1
	CD4+ [CD38+ HLA-DR -]	41.54 (2.488)	30.16 (5.524)	1.645 (0.865;3.127)	0.234	53	2.123	0.23	26.31 (8.410)	0.503 (0.261;0.97)	0.24	53	-2.869	0.035	30.61 (7.380)	1.61 (0.848;3.057)	0.234	53	2.037	0.28	26.31 (8.410)	30.16 (5.524)	0.827 (0.419;1.631)	0.248	53	-0.768	1	30.61 (7.380)	0.809 (0.411;1.594)	0.247	53	-0.855	1	30.61 (7.380)	30.16 (5.524)	1.021 (0.526;1.983)	0.242	53	0.088	1
	CD4+ [CD38+ HLA-DR +]	2.124 (0.9424)	0.785 (0.2261)	2.721 (1.022;7.239)	0.357	53	2.803	0.042	0.651 (0.2131)	0.305 (0.107;0.87)	0.382	53	-3.104	0.018	1.494 (0.5084)	1.428 (0.645;3.164)	0.29	53	1.228	1	0.651 (0.2131)	0.785 (0.2261)	0.831 (0.241;2.861)	0.451	53	-0.411	1	1.494 (0.5084)	0.436 (0.145;1.307)	0.4	53	-2.073	0.258	1.494 (0.5084)	0.785 (0.2261)	1.905 (0.679;5.348)	0.377	53	1.712	0.557
	CD4+ [CD38- HLA-DR +]	2.468 (0.7087)	0.741 (0.2024)	3.356 (1.482;7.603)	0.298	53	4.059	<0.001	2.063 (1.102)	0.833 (0.463;1.499)	0.214	53	-0.852	1	2.074 (0.9805)	1.194 (0.664;2.147)	0.214	53	0.827	1	2.063 (1.102)	0.741 (0.2024)	2.796 (1.212;6.45)	0.305	53	3.372	0.008	2.074 (0.9805)	0.994 (0.539;1.834)	0.223	53	-0.025	1	2.074 (0.9805)	0.741 (0.2024)	2.811 (1.22;6.482)	0.305	53	3.392	0.008
	CD4+ [CCR5]	0.026 (0.0207)	0.0420 (0.0459)	0.697 (0.223;2.178)	0.416	53	-0.868	1	0.0354 (0.0481)	1.252 (0.387;4.043)	0.428	53	0.525	1	0.03245 (0.04291)	0.854 (0.26;2.81)	0.434	53	-0.362	1	0.0354 (0.0481)	0.0420 (0.0459)	0.873 (0.3;2.543)	0.39	53	-0.349	1	0.03245 (0.04291)	1.069 (0.348;3.291)	0.41	53	0.164	1	0.03245 (0.04291)	0.0420 (0.0459)	0.816 (0.275;2.425)	0.397	53	-0.511	1
	CD4+ [CCR6]	11.67 (11.88)	27.67 (17.67)	0.346 (0.102;1.173)	0.446	53	-2.382	0.125	19.19 (14.12)	1.796 (0.499;6.467)	0.467	53	1.253	1	18.65 (12.42)	0.577 (0.159;2.087)	0.469	53	-1.173	1	19.19 (14.12)	27.67 (17.67)	0.621 (0.211;1.826)	0.394	53	-1.21	1	18.65 (12.42)	1.036 (0.328;3.275)	0.42	53	0.084	1	18.65 (12.42)	27.67 (17.67)	0.6 (0.203;1.775)	0.396	53	-1.292	1
	CD8+ [CD38+HLA-DR-]	28.76 (10.59)	21.61 (8.858)	1.464 (0.448;4.787)	0.432	53	0.882	1	19.66 (9.187)	0.606 (0.181;2.029)	0.441	53	-1.136	1	26.18 (16.05)	1.139 (0.363;3.575)	0.417	53	0.311	1	19.66 (9.187)	21.61 (8.858)	0.888 (0.251;3.135)	0.46	53	-0.259	1	26.18 (16.05)	0.69 (0.203;2.347)	0.446	53	-0.83	1	26.18 (16.05)	21.61 (8.858)	1.286 (0.387;4.272)	0.438	53	0.574	1
	CD8+ [CD38+HLA-DR+]	1.966 (1.118)	0.5425 (0.1652)	3.604 (0.148;87.75)	1.165	53	1.101	1	0.7175 (0.2859)	0.363 (0.02;6.522)	1.053	53	-0.961	1	1.209 (0.6413)	1.634 (0.144;18.566)	0.887	53	0.554	1	0.7175 (0.2859)	0.5425 (0.1652)	1.31 (0.031;55.241)	1.365	53	0.198	1	1.209 (0.6413)	0.594 (0.026;13.408)	1.137	53	-0.458	1	1.209 (0.6413)	0.5425 (0.1652)	2.206 (0.074;66.19)	1.241	53	0.637	1
	CD8+ [CCR5]	0.01857 (0.03361)	0.04282 (0.05721)	0.541 (0.165;1.778)	0.434	53	-1.416	0.976	0.005498 (0.0061)	0.542 (0.108;2.731)	0.59	53	-1.038	1	0.005888 (0.007198)	1.799 (0.362;8.941)	0.585	53	1.003	1	0.005498 (0.0061)	0.04282 (0.05721)	0.293 (0.067;1.289)	0.54	53	-2.271	0.163	0.005888 (0.007198)	0.975 (0.157;6.077)	0.667	53	-0.037	1	0.005888 (0.007198)	0.04282 (0.05721)	0.301 (0.069;1.303)	0.535	53	-2.247	0.173
48 Hours	CD3+	41.79 (19.61)	32.2 (17.11)	1.512 (0.562;4.069)	0.361	53	1.144	1	40.49 (18.17)	0.948 (0.361;2.489)	0.352	53	-0.152	1	26.21(14.51)	2.021 (0.726;5.621)	0.373	53	1.884	0.39	40.49 (18.17)	32.2 (17.11)	1.433 (0.531;3.865)	0.362	53	0.993	1	26.21(14.51)	1.915 (0.687;5.34)	0.374	53	1.737	0.529	26.21(14.51)	32.2 (17.11)	0.748 (0.262;2.135)	0.383	53	-0.758	1
	CD4+	59.88 (11.90)	58.61 (11.16)	1.054 (0.551;2.016)	0.237	53	0.221	1	55.79 (11.33)	0.846 (0.443;1.613)	0.236	53	-0.712	1	54.39 (13.50)	1.251 (0.657;2.385)	0.235	53	0.953	1	55.79 (11.33)	58.61 (11.16)	0.891 (0.468;1.697)	0.235	53	-0.491	1	54.39 (13.50)	1.058 (0.558;2.008)	0.234	53	0.242	1	54.39 (13.50)	58.61 (11.16)	0.842 (0.442;1.602)	0.235	53	-0.733	1
	CD8+	39.10 (12.31)	36.70 (11.72)	1.107 (0.569;2.156)	0.243	53	0.419	1	36.80 (11.17)	0.907 (0.466;1.766)	0.243	53	-0.402	1	42.00 (10.88)	0.887 (0.459;1.713)	0.24	53	-0.501	1	36.80 (11.17)	36.70 (11.72)	1.004 (0.514;1.963)	0.245	53	0.018	1	42.00 (10.88)	0.804 (0.415;1.56)	0.242	53	-0.902	1	42.00 (10.88)	36.70 (11.72)	1.249 (0.644;2.423)	0.242	53	0.919	1
	CD4+ [CD38+ HLA-DR -]	31.56 (8.219)	30.79 (5.254)	1.037 (0.536;2.004)	0.24	53	0.15	1	21.88 (9.564)	0.607 (0.302;1.221)	0.255	53	-1.956	0.334	28.55 (9.890)	1.154 (0.593;2.247)	0.243	53	0.59	1	21.88 (9.564)	30.79 (5.254)	0.63 (0.313;1.269)	0.256	53	-1.809	0.457	28.55 (9.890)	0.701 (0.346;1.422)	0.258	53	-1.376	1	28.55 (9.890)	30.79 (5.254)	0.898 (0.46;1.753)	0.244	53	-0.44	1
	CD4+ [CD38+ HLA-DR +]	1.273 (0.6300)	0.6275 (0.2504)	2.025 (0.648;6.329)	0.416	53	1.697	0.573	0.3348 (0.2544)	0.266 (0.064;1.107)	0.52	53	-2.546	0.083	1.263 (0.6233)	1.008 (0.397;2.561)	0.34	53	0.023	1	0.3348 (0.2544)	0.6275 (0.2504)	0.539 (0.112;2.589)	0.572	53	-1.079	1	1.263 (0.6233)	0.268 (0.065;1.117)	0.52	53	-2.529	0.087	1.263 (0.6233)	0.6275 (0.2504)	2.009 (0.642;6.288)	0.416	53	1.676	0.598
	CD4+ [CD38- HLA-DR +]	2.039 (0.6811)	0.4225 (0.2367)	4.815 (1.708;13.576)	0.378	53	4.156	<0.001	1.865 (0.9557)	0.914 (0.487;1.715)	0.23	53	-0.393	1	1.663 (0.9137)	1.23 (0.642;2.354)	0.237	53	0.873	1	1.865 (0.9557)	0.4225 (0.2367)	4.399 (1.547;12.506)	0.381	53	3.886	0.002	1.663 (0.9137)	1.123 (0.579;2.179)	0.242	53	0.481	1	1.663 (0.9137)	0.4225 (0.2367)	3.916 (1.361;11.264)	0.385	53	3.541	0.005
	CD4+ [CCR5]	0.056 (0.03699)	0.05038 (0.03799)	1.093 (0.428;2.792)	0.342	53	0.26	1	0.02354 (0.02682)	0.508 (0.166;1.551)	0.407	53	-1.663	0.613	0.03418 (0.04863)	1.494 (0.537;4.158)	0.373	53	1.075	1	0.02354 (0.02682)	0.05038 (0.03799)	0.555 (0.179;1.726)	0.414	53	-1.422	0.965	0.03418 (0.04863)	0.759 (0.227;2.535)	0.44	53	-0.627	1	0.03418 (0.04863)	0.05038 (0.03799)	0.732 (0.258;2.075)	0.38	53	-0.822	1
	CD4+ [CCR6]	17.04 (13.10)	26.83 (17.05)	0.56 (0.184;1.703)	0.406	53	-1.428	0.954	14.39 (14.49)	0.818 (0.236;2.836)	0.453	53	-0.442	1	16.11 (11.73)	1.07 (0.318;3.597)	0.443	53	0.152	1	14.39 (14.49)	26.83 (17.05)	0.458 (0.144;1.461)	0.423	53	-1.845	0.424	16.11 (11.73)	0.875 (0.249;3.074)	0.458	53	-0.29	1	16.11 (11.73)	26.83 (17.05)	0.524 (0.17;1.616)	0.411	53	-1.573	0.73
	CD8+ [CD38+HLA-DR-]	54.93 (15.39)	56.43 (19.21)	0.941 (0.337;2.629)	0.375	53	-0.162	1	54.20 (25.29)	0.971 (0.349;2.706)	0.374	53	-0.078	1	58.84 (18.70)	0.852 (0.304;2.391)	0.376	53	-0.424	1	54.20 (25.29)	56.43 (19.21)	0.914 (0.327;2.551)	0.375	53	-0.24	1	58.84 (18.70)	0.828 (0.295;2.32)	0.376	53	-0.502	1	58.84 (18.70)	56.43 (19.21)	1.104 (0.393;3.101)	0.377	53	0.262	1
	CD8+ [CD38+HLA-DR+]	1.573 (0.5404)	6.480 (17.18)	0.232 (0.035;1.52)	0.686	53	-2.131	0.227	0.3675 (0.2139)	0.236 (0.005;10.584)	1.388	53	-1.041	1	1.008 (0.9133)	1.564 (0.108;22.76)	0.977	53	0.458	1	0.3675 (0.2139)	6.480 (17.18)	0.055 (0.002;1.843)	1.284	53	-2.265	0.166	1.008 (0.9133)	0.369 (0.007;20.162)	1.46	53	-0.684	1	1.008 (0.9133)	6.480 (17.18)	0.148 (0.016;1.41)	0.822	53	-2.323	0.144
	CD8+ [CCR5]	0.008735 (0.01076)	0.09550 (0.09118)	0.177 (0.049;0.641)	0.469	53	-3.689	0.003	0.006528 (0.006274)	0.882 (0.157;4.971)	0.631	53	-0.199	1	0.02539 (0.03032)	0.529 (0.122;2.289)	0.534	53	-1.191	1	0.006528 (0.006274)	0.09550 (0.09118)	0.157 (0.04;0.607)	0.495	53	-3.75	0.003	0.02539 (0.03032)	0.467 (0.101;2.149)	0.557	53	-1.367	1	0.02539 (0.03032)	0.09550 (0.09118)	0.335 (0.124;0.907)	0.363	53	-3.01	0.024
72 Hours	CD3+	19.44 (12.40)	35.59 (21.55)	0.437 (0.145;1.314)	0.402	53	-2.062	0.265	34.81 (17.05)	2.213 (0.734;6.669)	0.403	53	1.973	0.322	23.45 (6.957)	0.788 (0.247;2.516)	0.424	53	-0.563	1	34.81 (17.05)	35.59 (21.55)	0.967 (0.358;2.613)	0.363	53	-0.094	1	23.45 (6.957)	1.743 (0.603;5.035)	0.387	53	1.436	0.942	23.45 (6.957)	35.59 (21.55)	0.555 (0.192;1.598)	0.386	53	-1.527	0.796
	CD4+	57.06 (10.33)	63.51 (10.82)	0.763 (0.397;1.467)	0.238	53	-1.133	1	48.70 (6.517)	1.171 (0.612;2.239)	0.237	53	0.666	1	60.88 (12.19)	1.4 (0.738;2.657)	0.234	53	1.439	0.936	48.70 (6.517)	63.51 (10.82)	0.894 (0.463;1.725)	0.24	53	-0.468	1	60.88 (12.19)	1.639 (0.86;3.125)	0.235	53	2.098	0.244	60.88 (12.19)	63.51 (10.82)	0.545 (0.285;1.045)	0.237	53	-2.557	0.081
	CD8+	39.34 (11.57)	35.19 (11.94)	1.194 (0.612;2.332)	0.244	53	0.728	1	33.69 (9.956)	0.783 (0.4;1.535)	0.245	53	-0.994	1	45.49 (5.572)	0.777 (0.404;1.497)	0.239	53	-1.055	1	33.69 (9.956)	35.19 (11.94)	0.936 (0.474;1.848)	0.248	53	-0.268	1	45.49 (5.572)	0.609 (0.313;1.186)	0.243	53	-2.04	0.278	45.49 (5.572)	35.19 (11.94)	1.537 (0.792;2.983)	0.242	53	1.777	0.488
	CD4+ [CD38+ HLA-DR -]	38.94 (15.13)	22.22 (12.31)	2.232 (1.129;4.415)	0.249	53	3.227	0.013	15.96 (8.247)	0.298 (0.143;0.623)	0.269	53	-4.504	<0.001	27.32 (16.02)	1.696 (0.88;3.269)	0.239	53	2.208	0.19	15.96 (8.247)	22.22 (12.31)	0.665 (0.303;1.458)	0.286	53	-1.424	0.963	27.32 (16.02)	0.505 (0.236;1.083)	0.278	53	-2.453	0.105	27.32 (16.02)	22.22 (12.31)	1.316 (0.647;2.676)	0.259	53	1.061	1
	CD4+ [CD38+ HLA-DR +]	1.155 (1.880)	0.2016 (0.3375)	5.559 (0.963;32.085)	0.64	53	2.682	0.058	0.1305 (0.1703)	0.119 (0.015;0.969)	0.764	53	-2.783	0.045	0.8475 (1.070)	1.363 (0.473;3.929)	0.386	53	0.802	1	0.1305 (0.1703)	0.2016 (0.3375)	0.663 (0.052;8.5)	0.931	53	-0.441	1	0.8475 (1.070)	0.163 (0.019;1.374)	0.779	53	-2.333	0.141	0.8475 (1.070)	0.2016 (0.3375)	4.079 (0.674;24.686)	0.657	53	2.14	0.222
	CD4+ [CD38- HLA-DR +]	0.8313 (0.4245)	0.1975 (0.3398)	4.08 (0.897;18.572)	0.553	53	2.543	0.084	0.6163 (0.5371)	0.743 (0.264;2.089)	0.377	53	-0.788	1	0.6288 (0.6288)	1.32 (0.472;3.689)	0.375	53	0.74	1	0.6163 (0.5371)	0.1975 (0.3398)	3.031 (0.633;14.51)	0.571	53	1.941	0.346	0.6288 (0.6288)	0.98 (0.326;2.948)	0.402	53	-0.05	1	0.6288 (0.6288)	0.1975 (0.3398)	3.092 (0.648;14.745)	0.57	53	1.981	0.317
	CD4+ [CCR5]	0.1328 (0.08079)	0.04528 (0.03726)	2.585 (1.122;5.952)	0.304	53	3.12	0.018	0.03809 (0.01549)	0.337 (0.14;0.81)	0.32	53	-3.4	0.008	0.05425 (0.02773)	2.224 (1.008;4.905)	0.289	53	2.768	0.046	0.03809 (0.01549)	0.04528 (0.03726)	0.87 (0.308;2.457)	0.379	53	-0.368	1	0.05425 (0.02773)	0.748 (0.274;2.042)	0.366	53	-0.791	1	0.05425 (0.02773)	0.04528 (0.03726)	1.162 (0.442;3.054)	0.352	53	0.427	1
	CD4+ [CCR6]	5.544 (4.747)	9.656 (11.83)	0.55 (0.094;3.199)	0.643	53	-0.932	1	2.029 (2.482)	0.354 (0.025;5.017)	0.967	53	-1.074	1	4.971 (4.827)	1.122 (0.149;8.47)	0.738	53	0.156	1	2.029 (2.482)	9.656 (11.83)	0.194 (0.016;2.372)	0.913	53	-1.794	0.471	4.971 (4.827)	0.397 (0.027;5.853)	0.982	53	-0.941	1	4.971 (4.827)	9.656 (11.83)	0.49 (0.079;3.024)	0.664	53	-1.074	1
	CD8+ [CD38+HLA-DR-]	65.88 (12.67)	71.94 (21.88)	0.753 (0.249;2.277)	0.404	53	-0.702	1	64.26 (28.28)	0.931 (0.319;2.717)	0.391	53	-0.182	1	68.81 (13.87)	0.875 (0.294;2.6)	0.397	53	-0.336	1	64.26 (28.28)	71.94 (21.88)	0.701 (0.233;2.109)	0.402	53	-0.883	1	68.81 (13.87)	0.815 (0.276;2.408)	0.395	53	-0.518	1	68.81 (13.87)	71.94 (21.88)	0.861 (0.281;2.635)	0.408	53	-0.368	1
	CD8+ [CD38+HLA-DR+]	0.7736 (0.6735)	0.2034 (0.3022)	3.694 (0.022;619.358)	1.869	53	0.699	1	0.1436 (0.3358)	0.195 (0.001;67.679)	2.135	53	-0.766	1	1.263 (2.061)	0.613 (0.03;12.578)	1.102	53	-0.444	1	0.1436 (0.3358)	0.2034 (0.3022)	0.72 (0.001;799.501)	2.559	53	-0.129	1	1.263 (2.061)	0.119 (0;34.41)	2.066	53	-1.029	1	1.263 (2.061)	0.2034 (0.3022)	6.028 (0.045;815.746)	1.791	53	1.003	1
	CD8+ [CCR5]	0.02238 (0.01946)	0.02525 (0.03793)	0.918 (0.264;3.197)	0.455	53	-0.187	1	0.001894 (0.003514)	0.367 (0.065;2.087)	0.634	53	-1.58	0.72	0.03998 (0.05530)	0.648 (0.204;2.058)	0.422	53	-1.03	1	0.001894 (0.003514)	0.02525 (0.03793)	0.337 (0.061;1.88)	0.627	53	-1.734	0.533	0.03998 (0.05530)	0.238 (0.046;1.242)	0.603	53	-2.381	0.125	0.03998 (0.05530)	0.02525 (0.03793)	1.418 (0.459;4.377)	0.411	53	0.85	1
